# Supplementary material for: Evolving antibody evasion and receptor affinity of the Omicron BA.2.75 sublineage of SARS-CoV-2
Source: PubMed Central journal article supplement (PMC10654603; doi:10.1016/j.isci.2023.108254), 2023-10-18
Supplement: mmc1.pdf [file mmc1.pdf]

iScience, Volume 26

## **Supplemental information**

### **Evolving antibody evasion and receptor affinity of the Omicron BA.2.75 sublineage of SARS-CoV-2**

**Qian Wang, Zhiteng Li, Yicheng Guo, Ian A. Mellis, Sho Iketani, Michael Liu, Jian Yu, Riccardo Valdez, Adam S. Luring, Zizhang Sheng, Aubree Gordon, Lihong Liu, and David D. Ho**

**A**

| Mutations on top of D614G | Alpha | Beta   | Gamma | Delta     |        |      |        |      |        |     |       |         |         |      |        |          |      |      |        |      |           |           |           |           |           |           |   |
|---------------------------|-------|--------|-------|-----------|--------|------|--------|------|--------|-----|-------|---------|---------|------|--------|----------|------|------|--------|------|-----------|-----------|-----------|-----------|-----------|-----------|---|
|                           | BA.1  | BA.1.1 | BA.2  | BA.2.12.1 | BA.4/5 | BF.7 | BA.4.6 | BQ.1 | BQ.1.1 | XBB | XBB.1 | XBB.1.5 | BA.2.75 | BL.1 | BM.4.1 | BM.4.1.1 | BN.1 | CH.1 | CH.1.1 | DS.1 | BA.2.75.1 | BA.2.75.2 | BA.2.75.4 | BA.2.75.5 | BA.2.75.6 | BA.2.75.7 |   |
| R346T                     | T     |        |       |           |        | T    | T      |      |        | T   | T     | T       | T       | T    |        |          |      |      |        |      | T         | T         | T         | T         | T         | T         | T |
| K444T                     |       |        |       |           |        |      |        |      |        | T   | T     |         |         |      |        |          |      |      |        | T    | T         |           |           |           |           |           |   |
| L452Q/R                   |       | R      |       |           | Q      | R    | R      | R    | R      | R   | R     |         |         |      |        |          |      |      | R      |      |           |           | R         |           |           |           |   |
| F486V/P/S                 |       |        |       |           | V      | V    | V      | V    | V      | S   | S     | P       |         |      |        |          | S    | S    | S      | S    | S         | S         |           | S         |           | S         |   |
| F490S                     |       |        |       |           |        |      |        |      |        | S   | S     | S       |         |      |        |          | S    |      |        | S    |           |           |           |           |           |           |   |
| D574V                     |       |        |       |           |        |      |        |      |        |     |       |         | V       |      |        |          |      |      |        |      | V         |           |           |           |           |           |   |
| K356T                     |       |        |       |           |        |      |        |      |        |     |       |         |         |      |        |          | T    |      | T      |      |           |           | T         |           |           | T         |   |
| R403K                     |       |        |       |           |        |      |        |      |        |     |       |         |         |      |        |          |      |      |        | K    |           |           |           |           |           |           |   |

**B**

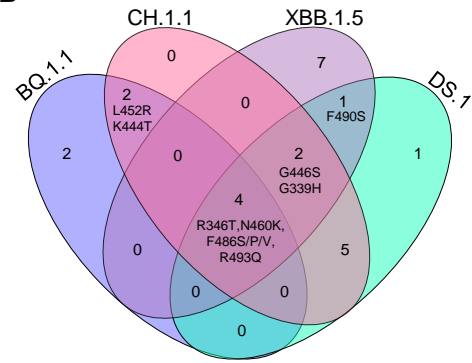

**Figure S1. Key spike mutation in BA.2.75 subvariants.** (A) Summary of spike mutations in SARS-CoV-2 VOCs. The convergent mutations are shown in blue and unique mutations among BA.2.75 subvariants are shown in orange. (B) The Venn diagram shows the number of shared spike mutations among BQ.1.1, XBB.1.5, CH.1.1, and DS.1 compared to BA.2. The RBD mutations shared by at least two subvariants are displayed. Related to **Figure 1**.

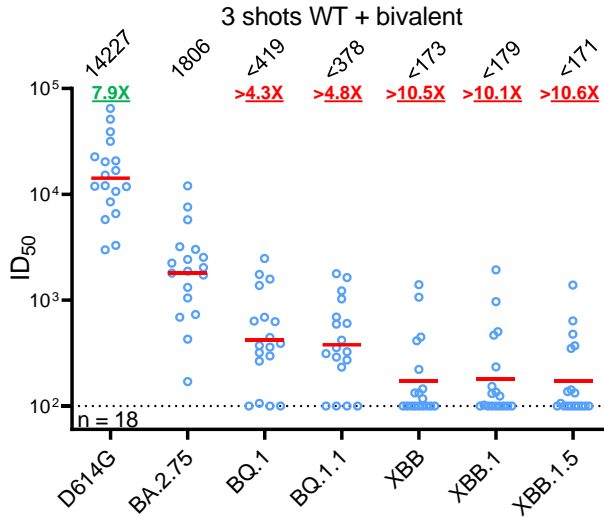

**Figure S2. Neutralization of pseudotyped SARS-CoV-2 subvariants by polyclonal sera from “3 shots WT + bivalent” cohort.** “3 shots WT + bivalent” refers to individuals vaccinated with three doses of the wildtype mRNA vaccine and subsequently one dose of a WA1/BA.5 bivalent mRNA vaccine. The results are shown as dots with geometric mean (red line). Values above the dots denote the raw geometric mean ID<sub>50</sub> values and the sample size (n) is shown on the lower left. The limit of detection is 100 (dotted line). Comparisons were made against BA.2.75 and the fold changes in ID<sub>50</sub> values are shown, with resistance to neutralization highlighted in red and sensitization in green. Statistically significant fold changes ( $p < 0.05$ , determined by using two-tailed Wilcoxon matched-pairs signed-rank tests) are highlighted in bold. Related to **Figure 4**.

**Table S1. Neutralization IC<sub>50</sub> values for indicated pseudotyped D614G, BA.4/5, BA.2.75, and BA.2.75 subvariants by mAbs. Related to Figure 3.**

| IC <sub>50</sub> (µg/ml) |                                              | NTD   | NTD-SD2 | SD1   | RBD mAbs |       |       |        |           |         |       |       |       |           |            |       |       |       |       |       |        |           |           |       |        |         |       |        |         |           |       |                       | Class 4           | Combinations |
|--------------------------|----------------------------------------------|-------|---------|-------|----------|-------|-------|--------|-----------|---------|-------|-------|-------|-----------|------------|-------|-------|-------|-------|-------|--------|-----------|-----------|-------|--------|---------|-------|--------|---------|-----------|-------|-----------------------|-------------------|--------------|
|                          |                                              |       |         |       | Class 1  |       |       |        |           | Class 2 |       |       |       |           | Class 3    |       |       |       |       |       |        |           |           |       |        |         |       |        |         |           |       |                       |                   |              |
| Pseudo-viruses           | Spike mutations in the background of BA.2.75 | C1620 | C7717   | S3H3  | Bih-196  | Omi-3 | Omi-8 | BD-915 | COV0X-222 | KG061   | KG047 | ZCB11 | SZE12 | COV2-2196 | LY-CoV1404 | P-7   | KG289 | KG264 | S309  | P2C3  | SP1-77 | BD55-5940 | BD55-3152 | KG282 | BD-904 | A19-461 | 2B85  | MM2002 | Bih-196 | COV2-2130 | 10-40 | COV2-2196 + COV2-2130 | Bih-196 + Bih-196 |              |
|                          |                                              | D614G | NA      | 0.004 | 0.293    | 0.033 | 0.022 | 0.009  | 0.023     | 0.019   | 0.017 | 0.001 | 0.002 | 0.003     | 0.001      | 0.002 | 0.002 | 0.005 | 0.002 | 0.001 | 0.027  | 0.001     | 0.004     | 0.002 | 0.003  | 0.000   | 0.016 | 0.013  | 0.018   | 0.006     | 0.250 | 0.008                 | 0.085             | 0.004        |
| BA.4/5                   | NA                                           | 0.002 | 0.218   | 0.030 | 0.904    | 0.049 | 0.014 | 0.010  | 0.113     | 0.108   | 2.429 | 3.347 | >10   | 0.842     | 0.001      | 0.066 | 0.041 | 0.003 | 0.577 | 0.002 | 0.007  | 0.018     | 0.071     | 0.001 | 0.022  | 7.765   | >10   | 4.148  | >10     | 0.028     | 0.806 | 0.070                 | 0.676             |              |
| BA.2.75                  | NA                                           | 0.004 | 0.303   | 0.028 | 1.418    | 0.064 | 0.028 | 0.127  | 2.000     | 0.002   | 0.002 | 0.003 | 0.017 | 0.032     | 0.005      | 1.859 | 0.074 | 0.006 | 0.436 | 0.003 | 0.003  | 0.598     | 0.152     | 0.009 | 0.046  | 0.007   | 0.611 | 0.001  | 0.899   | 0.244     | 3.346 | 0.046                 | 0.992             |              |
| BL.1                     | R346T/D574V                                  | 0.005 | 0.358   | 0.021 | 7.219    | 0.211 | 0.129 | 0.302  | >10       | 0.003   | 0.001 | 0.006 | 0.014 | 0.062     | 0.004      | 1.978 | 0.176 | 0.009 | 0.325 | 0.438 | >10    | 2.464     | >10       | 0.025 | 7.836  | 0.804   | 7.501 | >10    | >10     | >10       | 2.912 | 0.163                 | 2.581             |              |
| BM.4.1/BA.2.75.7         | F486S                                        | 0.003 | 0.334   | 0.019 | 7.726    | 1.797 | 0.595 | 0.950  | >10       | 0.909   | >10   | >10   | >10   | >10       | 0.005      | 1.967 | 0.132 | 0.005 | 0.254 | 0.003 | 0.003  | 0.728     | 0.140     | 0.008 | 0.045  | 0.098   | 0.601 | 0.090  | 1.616   | 0.042     | 2.665 | 0.080                 | 2.233             |              |
| BM.4.1.1                 | R346T/F486S                                  | 0.002 | 0.390   | 0.011 | 4.461    | 1.450 | 0.417 | 0.520  | >10       | 0.472   | >10   | >10   | >10   | 2.584     | 0.002      | 1.251 | 0.077 | 0.009 | 0.280 | 0.204 | >10    | >10       | >10       | 0.004 | 0.939  | 0.355   | >10   | >10    | 6.341   | >10       | 1.326 | >10                   | 2.150             |              |
| BN.1                     | R346T/K356T/F490S                            | 0.002 | 0.341   | 0.011 | 3.564    | 0.168 | 0.049 | 0.131  | >10       | 0.002   | 0.001 | 0.004 | 0.018 | 0.073     | 0.002      | 2.381 | 0.059 | 0.004 | 5.208 | 0.164 | >10    | >10       | >10       | 0.018 | >10    | >10     | >10   | >10    | >10     | >10       | 3.717 | 0.215                 | 2.347             |              |
| CH.1                     | R346T/F486S/K444T                            | 0.002 | 0.314   | 0.010 | >10      | 0.555 | 0.332 | 0.488  | 6.302     | 0.510   | >10   | >10   | >10   | >10       | >10        | >10   | 0.338 | >10   | 0.291 | >10   | >10    | >10       | >10       | 0.132 | >10    | 0.570   | >10   | >10    | >10     | >10       | 6.003 | >10                   | >10               |              |
| CH.1.1                   | R346T/F486S/L452R/K444T                      | 0.002 | 1.089   | 0.011 | >10      | 1.611 | 0.496 | 0.635  | >10       | >10     | >10   | >10   | >10   | >10       | >10        | 1.269 | >10   | 0.437 | >10   | >10   | >10    | >10       | 2.529     | >10   | >10    | >10     | >10   | >10    | >10     | >10       | >10   | >10                   | >10               | >10          |
| DS.1                     | R346T/K356T/R403K/F486S/K444T                | 0.002 | 0.403   | 0.015 | >10      | 1.289 | 0.642 | 2.312  | >10       | >10     | >10   | >10   | >10   | >10       | 0.002      | 3.870 | 0.045 | 0.003 | >10   | 0.409 | >10    | >10       | >10       | 0.012 | >10    | >10     | >10   | >10    | >10     | >10       | >10   | 6.095                 | >10               | >10          |
| BA.2.75.1                | D574V                                        | 0.004 | 0.479   | 0.020 | >10      | 0.229 | 0.141 | 0.410  | >10       | 0.005   | 0.002 | 0.006 | 0.023 | 0.057     | 0.006      | 4.608 | 0.208 | 0.008 | 0.399 | 0.003 | 0.007  | 0.696     | 0.200     | 0.024 | 0.108  | 0.248   | 1.517 | 0.259  | 1.660   | 0.051     | >10   | 0.083                 | 1.851             |              |
| BA.2.75.2                | R346T/F486S/D1199N                           | 0.002 | 0.266   | 0.013 | >10      | 0.328 | 0.297 | 0.610  | >10       | 0.465   | >10   | >10   | >10   | 6.404     | 0.002      | 1.539 | 0.123 | 0.008 | 0.215 | 0.159 | >10    | >10       | >10       | 0.005 | 0.786  | 0.327   | >10   | >10    | >10     | >10       | >10   | 3.531                 | >10               | >10          |
| BA.2.75.4                | L452R                                        | 0.007 | 0.272   | 0.020 | 1.120    | 0.059 | 0.029 | 0.097  | 1.522     | 0.003   | 0.001 | 0.004 | 0.013 | 0.031     | 0.008      | 5.440 | 0.266 | 0.008 | 0.257 | 0.004 | 0.008  | 3.084     | 0.053     | 0.345 | 1.196  | 8.823   | >10   | >10    | >10     | 2.017     | 1.219 | 0.056                 | 0.884             |              |
| BA.2.75.5                | K356T                                        | 0.002 | 0.338   | 0.012 | 1.410    | 0.185 | 0.082 | 0.164  | 2.757     | 0.002   | 0.001 | 0.003 | 0.017 | 0.091     | 0.002      | 2.322 | 0.197 | 0.004 | 2.453 | 0.003 | 0.025  | >10       | >10       | 0.009 | 0.042  | 0.387   | >10   | >10    | 0.070   | 0.686     | 0.072 | 6.696                 |                   |              |
| BA.2.75.6                | R346T                                        | 0.011 | 0.336   | 0.027 | 0.693    | 0.076 | 0.052 | 0.142  | 1.180     | 0.002   | 0.002 | 0.005 | 0.023 | 0.043     | 0.004      | 0.799 | 0.079 | 0.009 | 0.383 | 0.340 | 4.524  | 2.493     | 5.272     | 0.008 | 0.541  | 1.140   | >10   | >10    | >10     | >10       | 1.175 | 0.072                 | 0.955             |              |
| BA.2.75-R403K            | R403K                                        | 0.009 | 0.120   | 0.032 | 0.577    | 0.005 | 0.005 | 0.030  | 5.100     | 0.003   | 0.002 | 0.001 | 0.009 | 0.016     | 0.002      | 3.903 | 0.041 | 0.002 | 0.504 | 0.002 | 0.004  | 0.540     | 0.061     | 0.012 | 0.014  | 0.030   | 0.234 | 0.059  | 0.234   | 0.060     | 4.421 | 0.021                 | 0.744             |              |
| BA.2.75-K444M            | K444M                                        | 0.008 | 0.291   | 0.017 | 1.943    | 0.043 | 0.042 | 0.089  | 3.832     | 0.001   | 0.001 | 0.003 | 0.008 | 0.018     | >10        | >10   | 0.348 | 0.211 | 0.183 | 0.866 | 2.638  | >10       | 0.149     | 0.125 | >10    | 0.249   | 0.513 | >10    | 0.839   | >10       | 6.567 | 0.040                 | 0.763             |              |
| BA.2.75-K444T            | K444T                                        | 0.004 | 0.207   | 0.012 | 0.869    | 0.039 | 0.048 | 0.066  | 1.036     | 0.002   | 0.001 | 0.003 | 0.009 | 0.020     | >10        | >10   | 0.458 | >10   | 0.182 | 0.509 | >10    | 1.852     | 0.120     | 0.136 | >10    | 0.124   | 0.297 | >10    | 0.640   | >10       | >10   | 0.048                 | 0.628             |              |
| BA.2.75-F490S            | F490S                                        | 0.003 | 0.261   | 0.014 | 1.278    | 0.098 | 0.051 | 0.146  | 3.598     | 0.001   | 0.001 | 0.003 | 0.009 | 0.030     | 0.003      | 1.235 | 0.079 | 0.004 | 0.169 | 0.002 | 0.004  | 0.867     | 0.055     | 0.018 | 0.023  | 5.454   | 4.844 | 4.318  | 5.298   | 0.034     | 1.343 | 0.041                 | 1.163             |              |
| BA.2.75-D1199N           | D1199N                                       | 0.008 | 0.247   | 0.024 | 0.827    | 0.044 | 0.040 | 0.089  | 1.024     | 0.002   | 0.002 | 0.003 | 0.012 | 0.021     | 0.003      | 0.735 | 0.095 | 0.006 | 0.243 | 0.003 | 0.006  | 0.327     | 0.107     | 0.010 | 0.029  | 0.077   | 0.295 | 0.041  | 0.504   | 0.029     | 3.434 | 0.035                 | 0.593             |              |

<0.01 <0.1 <1 <10 >10

**Table S2. Demographics of clinical cohorts in this study. Related to Figure 4.**

| Sample ID              | Vaccine type and infected strain               | Days post-vaccination or<br>*infection (after last exposure) | Documented<br>COVID-19 | Age | Gender | Race/Ethnicity |
|------------------------|------------------------------------------------|--------------------------------------------------------------|------------------------|-----|--------|----------------|
| 3 shots W/T            |                                                |                                                              |                        |     |        |                |
| 1                      | mRNA-1273/mRNA-1273/mRNA-1273                  | 29                                                           | No                     | 66  | Female | White          |
| 2                      | BNT162b2/BNT162b2/BNT162b2                     | 30                                                           | No                     | 68  | Male   | White          |
| 3                      | BNT162b2/BNT162b2/BNT162b2                     | 14                                                           | No                     | 64  | Female | Asian          |
| 4                      | BNT162b2/BNT162b2/BNT162b2                     | 34                                                           | No                     | 55  | Male   | Asian          |
| 5                      | BNT162b2/BNT162b2/BNT162b2                     | 34                                                           | No                     | 45  | Male   | Asian          |
| 6                      | BNT162b2/BNT162b2/BNT162b2                     | 15                                                           | No                     | 48  | Female | Asian          |
| 7                      | BNT162b2/BNT162b2/BNT162b2                     | 29                                                           | No                     | 71  | Male   | Asian          |
| 8                      | BNT162b2/BNT162b2/BNT162b2                     | 87                                                           | No                     | 66  | Female | Asian          |
| 9                      | BNT162b2/BNT162b2/BNT162b2                     | 84                                                           | No                     | 26  | Male   | White          |
| 10                     | mRNA-1273/mRNA-1273/mRNA-1273                  | 23                                                           | No                     | 28  | Female | White          |
| 11                     | BNT162b2/BNT162b2/mRNA-1273                    | 32                                                           | No                     | 39  | Male   | Asian          |
| 3 shots W/T + bivalent |                                                |                                                              |                        |     |        |                |
| 12                     | BNT162b2/BNT162b2/BNT162b2/Moderna Bivalent    | 24                                                           | No                     | 38  | Female | White          |
| 13                     | BNT162b2/BNT162b2/BNT162b2/Moderna Bivalent    | 27                                                           | No                     | 42  | Female | White          |
| 14                     | mRNA-1273/mRNA-1273/mRNA-1273/Moderna Bivalent | 24                                                           | No                     | 36  | Male   | White          |
| 15                     | BNT162b2/BNT162b2/BNT162b2/Pfizer Bivalent     | 25                                                           | No                     | 37  | Female | White          |
| 16                     | BNT162b2/BNT162b2/BNT162b2/Pfizer Bivalent     | 24                                                           | No                     | 36  | Male   | White          |
| 17                     | BNT162b2/BNT162b2/BNT162b2/Pfizer Bivalent     | 25                                                           | No                     | 49  | Female | White          |
| 18                     | BNT162b2/BNT162b2/BNT162b2/Moderna Bivalent    | 25                                                           | No                     | 37  | Female | Asian          |
| 19                     | BNT162b2/BNT162b2/BNT162b2/Pfizer Bivalent     | 26                                                           | No                     | 45  | Male   | White          |
| 20                     | BNT162b2/BNT162b2/mRNA-1273/Moderna Bivalent   | 26                                                           | No                     | 43  | Female | White          |
| 21                     | mRNA-1273/mRNA-1273/mRNA-1273/Moderna Bivalent | 29                                                           | No                     | 32  | Female | White          |
| 22                     | BNT162b2/BNT162b2/BNT162b2/Pfizer Bivalent     | 26                                                           | No                     | 43  | Female | White          |
| 23                     | BNT162b2/BNT162b2/mRNA-1273/Moderna Bivalent   | 29                                                           | No                     | 38  | Female | White          |
| 24                     | BNT162b2/BNT162b2/BNT162b2/Moderna Bivalent    | 28                                                           | No                     | 38  | Female | White          |
| 25                     | BNT162b2/BNT162b2/mRNA-1273/Moderna Bivalent   | 27                                                           | No                     | 36  | Female | White          |
| 26                     | BNT162b2/BNT162b2/BNT162b2/Moderna Bivalent    | 30                                                           | No                     | 24  | Female | White          |
| 27                     | mRNA-1273/mRNA-1273/mRNA-1273/Moderna Bivalent | 30                                                           | No                     | 32  | Female | Asian          |
| 28                     | BNT162b2/BNT162b2/mRNA-1273/Moderna Bivalent   | 23                                                           | No                     | 39  | Male   | Asian          |
| 29                     | BNT162b2/BNT162b2/BNT162b2/Pfizer Bivalent     | 30                                                           | No                     | 26  | Female | Asian          |
| BA.2 breakthrough      |                                                |                                                              |                        |     |        |                |
| 30                     | BNT162b2/BNT162b2/BA.2                         | *14                                                          | Yes                    | 50  | Female | Asian          |
| 31                     | BNT162b2/BNT162b2/BNT162b2/Ad26.COVS.2/BA.2    | *22                                                          | Yes                    | 69  | Male   | Asian          |
| 32                     | BNT162b2/BNT162b2/mRNA-1273/BA.2               | *16                                                          | Yes                    | 32  | Male   | Asian          |
| 33                     | mRNA-1273/mRNA-1273/mRNA-1273/BA.2             | *14                                                          | Yes                    | 34  | Male   | Asian          |
| 34                     | BNT162b2/BNT162b2/mRNA-1273/BA.2               | *19                                                          | Yes                    | 33  | Female | Asian          |
| 35                     | BNT162b2/BNT162b2/mRNA-1273/BA.2               | *18                                                          | Yes                    | 29  | Female | Asian          |
| 36                     | BNT162b2/BNT162b2/monovalent boost/BA.2        | *122                                                         | Yes                    | 22  | Male   | White          |
| 37                     | mRNA-1273/mRNA-1273/monovalent boost/BA.2      | *164                                                         | Yes                    | 30  | Female | White          |
| 38                     | BNT162b2/BNT162b2/monovalent boost/BA.2        | *94                                                          | Yes                    | 30  | Female | White          |
| BA.4/5 breakthrough    |                                                |                                                              |                        |     |        |                |
| 39                     | BNT162b2/BNT162b2/BNT162b2/BA.5                | *29                                                          | Yes                    | 44  | Female | Unknown        |
| 40                     | BNT162b2/BNT162b2/mRNA-1273/BA.5               | *29                                                          | Yes                    | 36  | Female | Asian          |
| 41                     | BNT162b2/BNT162b2/BNT162b2/BNT162b2/BA.5       | *31                                                          | Yes                    | 54  | Female | White          |
| 42                     | BNT162b2/BNT162b2/BNT162b2/BNT162b2/BA.5       | *28                                                          | Yes                    | 69  | Male   | White          |
| 43                     | BNT162b2/BNT162b2/BNT162b2/BNT162b2/BA.5       | *42                                                          | Yes                    | 44  | Male   | White          |
| 44                     | BNT162b2/BNT162b2/BNT162b2/BNT162b2/BA.5       | *28                                                          | Yes                    | 41  | Female | White          |
| 45                     | BNT162b2/BNT162b2/BNT162b2/BNT162b2/BA.5       | *31                                                          | Yes                    | 29  | Female | White          |
| 46                     | BNT162b2/BNT162b2/BNT162b2/BNT162b2/BA.5       | *29                                                          | Yes                    | 48  | Female | White          |
| 47                     | BNT162b2/BNT162b2/BNT162b2/BNT162b2/BA.5       | *29                                                          | Yes                    | 49  | Female | Asian          |
| 48                     | BNT162b2/BNT162b2/mRNA-1273/BNT162b2/BA.5      | *28                                                          | Yes                    | 37  | Female | White          |
| 49                     | mRNA-1273/mRNA-1273/BNT162b2/BA.5.2.1          | *29                                                          | Yes                    | 29  | Female | White          |
| 50                     | BNT162b2/BNT162b2/BNT162b2/BA.5                | *22                                                          | Yes                    | 61  | Female | White          |
| 51                     | mRNA-1273/mRNA-1273/mRNA-1273/BA.5             | *15                                                          | Yes                    | 28  | Female | White          |
| 52                     | mRNA-1273/mRNA-1273/mRNA-1273/BA.5             | *21                                                          | Yes                    | 24  | Female | White          |
| 53                     | BNT162b2/BNT162b2/BNT162b2/BA.5                | *75                                                          | Yes                    | 35  | Female | White          |
| 54                     | BNT162b2/BNT162b2/mRNA-1273/BA.5               | *63                                                          | Yes                    | 46  | Female | White          |
| 55                     | BNT162b2/BNT162b2/BNT162b2/BA.5                | *28                                                          | Yes                    | 55  | Male   | Asian          |
| 56                     | BNT162b2/BNT162b2/BNT162b2/BA.5                | *17                                                          | Yes                    | 57  | Female | White          |
